# Supplementary material for: Dual-binding pyridine and rhodamine B conjugate derivatives as fluorescent chemosensors for ferric ions in aqueous media and living cells
Source: Royal Society of Chemistry journal article supplement (doi:10.1039/c8an01915k), 2019-01-01
Supplement: c8an01915k1.pdf [file c8an01915k1.pdf]

## Electronic Supplementary Information

### Dual-binding pyridine and rhodamine B conjugate derivatives as fluorescent chemosensors for Ferric ion in aqueous media and living cells

Fan Song,<sup>a</sup> Chao Yang,<sup>b</sup> Haibo Liu,<sup>c</sup> Zhigang Gao,<sup>c</sup> Jing Zhu,<sup>\*b</sup> Xiaofeng Bao<sup>\*c</sup> and Chun Kan<sup>\*a</sup>

<sup>a</sup> College of Science, Nanjing Forestry University, Nanjing 210037, China.

<sup>b</sup> Department of Pharmacy, Jiangsu Key Laboratory for Pharmacology and Safety Evaluation of Chinese Materia Medica, Nanjing University of Chinese Medicine, Nanjing 210023, China.

<sup>c</sup> School of Environmental and Biological Engineering, Jiangsu Key Laboratory of Chemical Pollution Control and Resources Reuse, Nanjing University of Science and Technology, Nanjing 210094, China.

### Contents

|                                               |            |
|-----------------------------------------------|------------|
| <b>1. Materials and General Methods</b> ..... | <b>S-2</b> |
| <b>2. Synthesis</b> .....                     | <b>S-2</b> |
| <b>3. NMR and MS spectra</b> .....            | <b>S-3</b> |
| <b>4. Experiment graphs and Tables</b> .....  | <b>S-7</b> |

## 1. Materials and General Methods.

All reagents and organic solvents were of ACS grade or higher and were used without further purification. Unless otherwise noted, all chemicals were purchased from J&K Scientific (Shanghai, China) and were used as received. All solvents were of analytical grade, and double-distilled water was used in all of the experiments. The salts used in the stock solutions of metal ions were  $\text{CdCl}_2 \cdot 2.5\text{H}_2\text{O}$ ,  $\text{CuCl}_2 \cdot 2\text{H}_2\text{O}$ ,  $\text{AlCl}_3$ ,  $\text{KNO}_3$ ,  $\text{FeCl}_3 \cdot 6\text{H}_2\text{O}$ ,  $\text{HgCl}_2$ ,  $\text{NiCl}_2 \cdot 6\text{H}_2\text{O}$ ,  $\text{MgCl}_2 \cdot 6\text{H}_2\text{O}$ ,  $\text{NaCl}$ ,  $\text{ZnCl}_2$ ,  $\text{CrCl}_3 \cdot 6\text{H}_2\text{O}$ ,  $\text{Ba}(\text{NO}_3)_2$ ,  $\text{MnCl}_2 \cdot 4\text{H}_2\text{O}$ ,  $\text{CoCl}_2 \cdot 6\text{H}_2\text{O}$ ,  $\text{CaCl}_2$  and  $\text{PbCl}_2$ . The reactions were performed under an argon atmosphere using standard Schlenk techniques. Thin-layer chromatography was performed on a HAIYANG silica gel F254 plate and compounds were visualized under UV light ( $\lambda=254\text{nm}$ ). Column chromatography was performed using HAIYANG silicagel (type: 200–300 mesh ZCX-2).

$^1\text{H}$  (500 MHz) and  $^{13}\text{C}$  NMR (126 MHz) spectra were recorded on an Avance 500 spectrometer (Bruker; Billerica, MA, USA). The chemical shifts are reported in  $\delta$  units (ppm) downfield relative to the chemical shift of tetramethyl silane. The abbreviations br, s, d, t, and m denote broad, singlet, doublet, triplet, and multiplet, respectively. Mass spectra were obtained with a Finnigan TSQ Quantum LC/MS spectrometer. High-resolution mass spectra (HRMS) were acquired under electron ionization conditions with a double-focusing high-resolution instrument (Autospec; Micromass Inc.). The pH levels of stock solutions were measured using a PHS-25C Precision pH/mV meter (Aolilong, Hangzhou, China). UV–vis and fluorescence spectra were obtained on a UV-3600 UV-vis-NIR spectrophotometer (Shimadzu, Japan) and an Edinburgh FLS920 fluorescence spectrophotometer (Livingston, UK), respectively, at room temperature. Cell imaging was performed with an inverted fluorescence microscope (OLYMPUS, IX83).

## 2. Synthesis.

### Synthesis of Compound 1

Ethylenediamine (1.3mL, 20mmol.) was added to a solution of rhodamine B (960mg, 2mmol) in ethanol (20 mL). The mixture was refluxed for 12h and then evaporated to dryness under a vacuum. The residue was dissolved in  $\text{CH}_2\text{Cl}_2$  and then washed with  $\text{H}_2\text{O}$  and brine. The organic layer was dried with  $\text{MgSO}_4$ . After removal of the solvent, flash chromatography (silica gel;  $\text{MeOH}/\text{CH}_2\text{Cl}_2=3/97$ , v/v) of the residue yielded 1 as a pink solid (880mg, 92%).  $^1\text{H}$  NMR( $\text{CDCl}_3$ ),  $\delta$ 7.90 (dd,  $J=5.6, 3.0\text{Hz}$ , 1H), 7.61-7.38(m, 2H), 7.09 (dd,  $J=5.6, 2.9\text{Hz}$ , 1H), 6.43 (d,  $J=8.8\text{Hz}$ , 2H), 6.37(d,  $J=2.5\text{Hz}, 2\text{H}$ ), 6.27 (dd,  $J=8.9, 2.6\text{Hz}$ , 2H), 3.38-3.27 (m, 8H), 3.19 (t,  $J_1=6.65\text{Hz}, J_2=6.6\text{Hz}$ , 2H), 2.41 (t,  $J_1=6.65\text{Hz}, J_2=6.6\text{Hz}$ , 2H), 1.16 (t,  $J_1=7.0\text{Hz}, J_2=7.1\text{Hz}$ , 12H) ppm.  $^{13}\text{C}$  NMR ( $\text{CDCl}_3$ ),  $\delta$ 168.59, 153.35, 148.79, 132.38, 131.20, 128.64, 128.02, 123.80, 122.71, 108.13, 105.65, 97, 64.91, 44.36, 44.06, 40.73, 12.56 ppm. ESI-MS (M+H)<sup>+</sup> found, 485.29; calculated for  $\text{C}_{30}\text{H}_{37}\text{N}_4\text{O}_2$ , 484.64.

### Synthesis of RBPO

2-Picolinic acid (90mg, 0.73mmol), N,N'-Dicyclohexylcarbodiimide (DCC, 430mg, 2.09mmol), 1-Hydroxybenzotriazole (HOBt, 280mg, 2.07mmol), N,N-Diisopropylethylamine (DIPEA, 280 $\mu\text{L}$ , 2.17mmol) was dissolved in 30mL of dry  $\text{CH}_2\text{Cl}_2$ . The mixture was stirred at room temperature for 1h. To a

solution of 1 (330mg, 0.68mmol) was added to the mixture above. The mixture was stirred at room temperature for 2h, and the solvent was removed in a vacuum. The residue was dissolved in CH<sub>2</sub>Cl<sub>2</sub> and then washed with H<sub>2</sub>O. The organic phase was dried with Magnesium sulfate and then concentrated. The residue was purified by column chromatography using petroleum ether/ethyl acetate (4:6, v/v) as an eluent to give **RBPO** as an orange solid (235mg, 61%). <sup>1</sup>H NMR (CDCl<sub>3</sub>), δ8.66 (s, 1H), 8.60(d, J=4.1Hz, 1H), 8.10 (d, J=7.8Hz, 1H), 7.94 (s, 1H), 7.78 (t, J=7.7Hz, 1H), 7.43 (s, 2H), 7.37 (t, J=6.0Hz, 1H), 7.07 (s, 1H), 6.47 (d, J=8.6Hz, 2H), 6.38 (s, 2H), 6.24 (d, J=8.1Hz, 2H), 3.49 (s, 2H), 3.42 (d, J=5.4Hz, 2H), 3.32 (dd, J=6.5, 5.4Hz, 8H), 1.16 (t, J=6.7Hz, 12H) ppm. <sup>13</sup>C NMR (CDCl<sub>3</sub>), δ171.13, 169.22, 164.45, 153.58, 150.17, 148.56, 136.98, 132.55, 130.66, 128.28, 125.77, 122.93, 108.19, 105.10, 97.81, 77.10, 65.27, 60.38, 53.46, 48.88, 44.33, 39.60, 33.96, 25.33, 21.04, 12.60 ppm. ESI-MS (M+H)<sup>+</sup> found, 590.31; calculated for C<sub>36</sub>H<sub>39</sub>N<sub>5</sub>O<sub>3</sub>, 589.74.

### Synthesis of RBPF

To a solution of 1 (212mg, 0.44mmol) in 10mL of dry CH<sub>2</sub>Cl<sub>2</sub> was added pyridine-2,6-dicarbonyl dichloride (37mg, 0.18mmol) and triethylamine (46μL, 0.32mmol). The mixture was stirred at room temperature for 3h, and the solvent was removed in a vacuum. The residue was dissolved in CH<sub>2</sub>Cl<sub>2</sub> and then washed with H<sub>2</sub>O. The organic phase was dried with Magnesium sulfate and then concentrated. The residue was purified by column chromatography using 0.3% MeOH/CH<sub>2</sub>Cl<sub>2</sub> as an eluent to give **RBPF** as an orange solid (136mg, 55%). <sup>1</sup>H NMR (CDCl<sub>3</sub>), δ8.19 (d, J=7.8Hz, 2H), 8.02(d, J=7.5Hz, 2H), 7.89 (t, J<sub>1</sub>=7.7Hz, J<sub>2</sub>=7.8Hz, 1H), 7.41-7.52 (m, 4H), 7.07 (d, J=7.5Hz, 2H), 6.51 (d, J=8.9, 4H), 6.38 (s, 4H), 6.23 (dd, J=8.9, 3.6Hz, 4H), 3.58 (d, J=6.0Hz, 4H), 3.40 (d, J=5.4Hz, 4H), 3.25-3.32 (m, 16H), 1.14 (s, 24H) ppm. <sup>13</sup>C NMR (CDCl<sub>3</sub>), δ168.67, 163.01, 152.71, 147.65, 137.26, 131.59, 129.30, 122.67, 107.25, 104.27, 97, 64.67, 52.49, 43.35, 39.10, 30.95, 28.72, 21.72, 11.68 ppm. ESI-MS (M+H)<sup>+</sup> found, 1100.57; calculated for C<sub>67</sub>H<sub>73</sub>N<sub>9</sub>O<sub>6</sub>, 1100.38.

### 3. NMR and MS spectra.

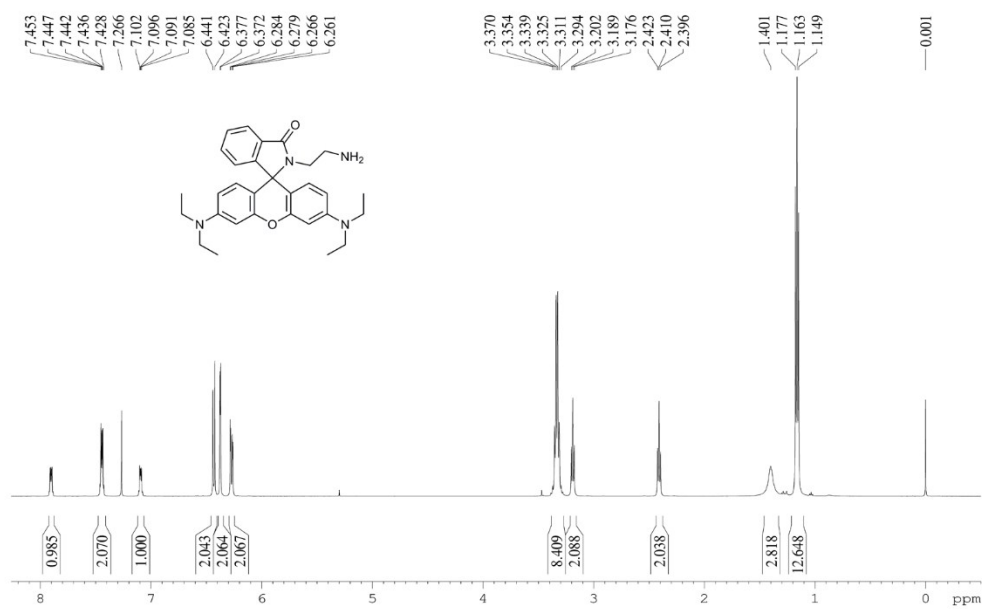

Fig. S-1 <sup>1</sup>H NMR (CDCl<sub>3</sub>, 500 MHz) spectra of compound 1.

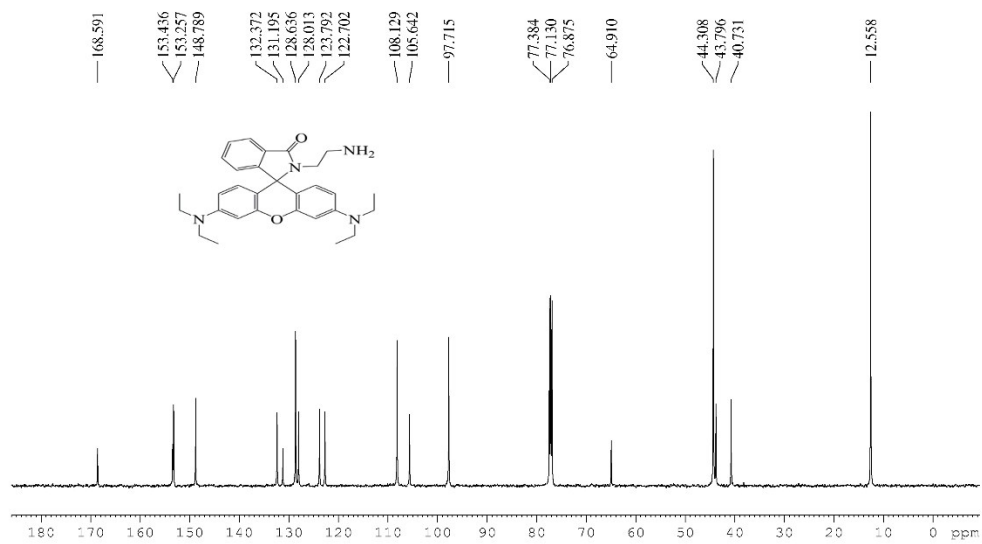

Fig. S-2 <sup>13</sup>C NMR (CDCl<sub>3</sub>, 125 MHz) spectra of compound 1.

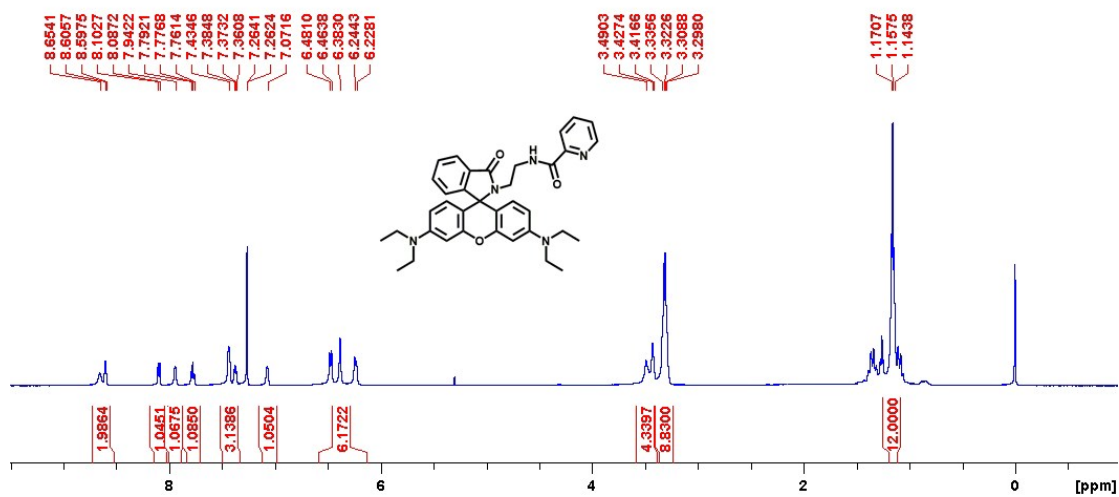

Fig. S-3  $^1\text{H}$  NMR ( $\text{CDCl}_3$ , 500 MHz) spectra of compound RBPO.

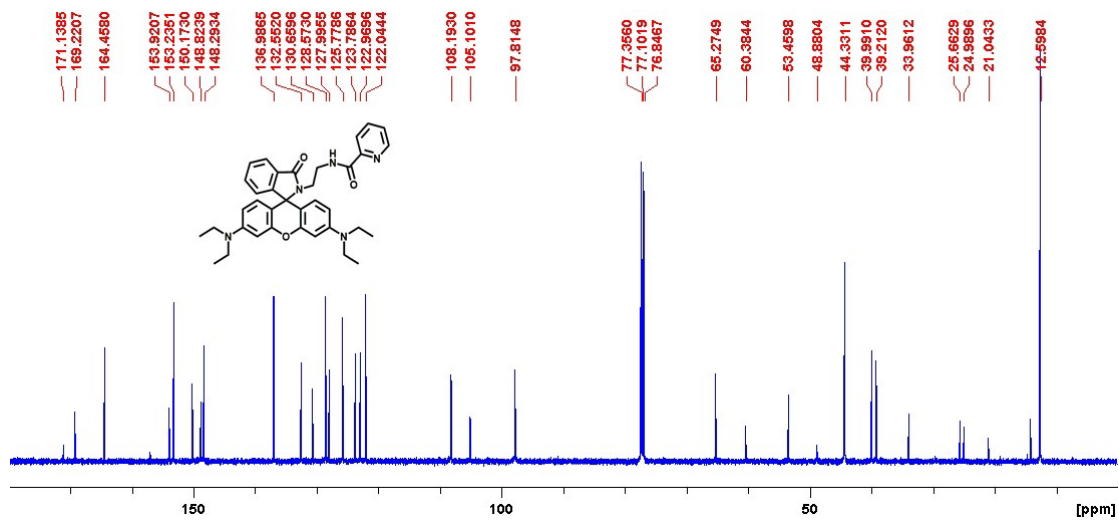

Fig. S-4  $^{13}\text{C}$  NMR ( $\text{CDCl}_3$ , 125 MHz) spectra of compound RBPO.

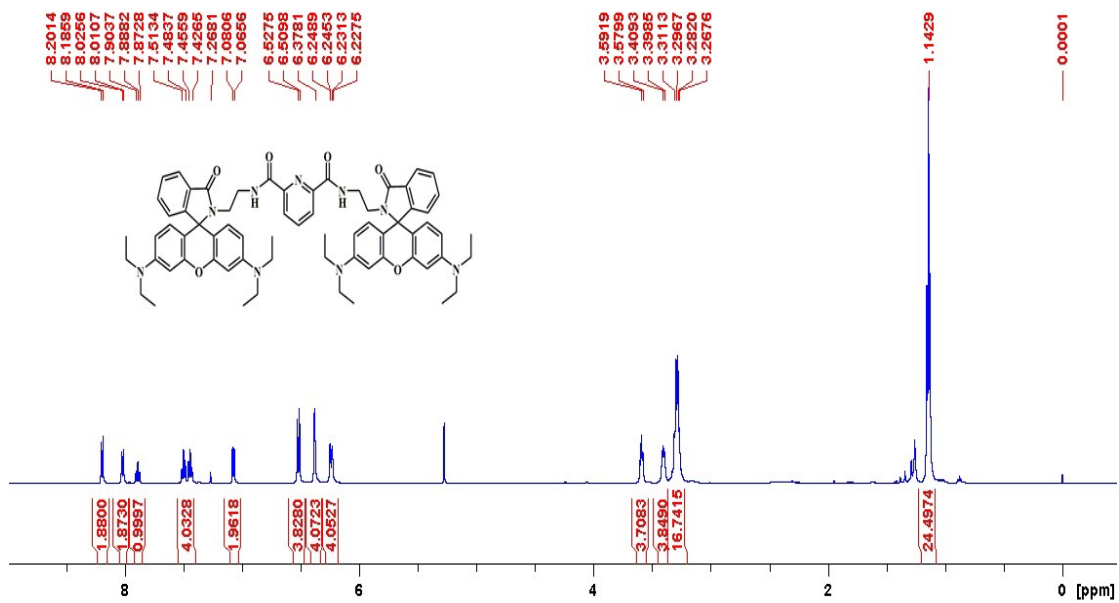

Fig. S-5 <sup>1</sup>H NMR (CDCl<sub>3</sub>, 500 MHz) spectra of compound RBPF.

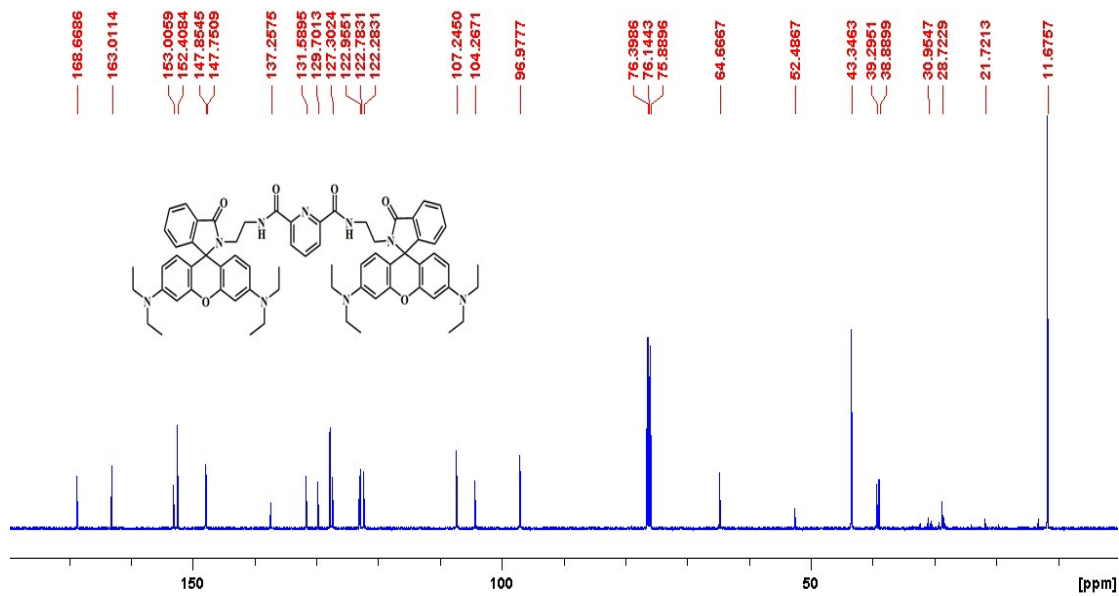

Fig. S-6 <sup>13</sup>C NMR (CDCl<sub>3</sub>, 125 MHz) spectra of compound RBPF.

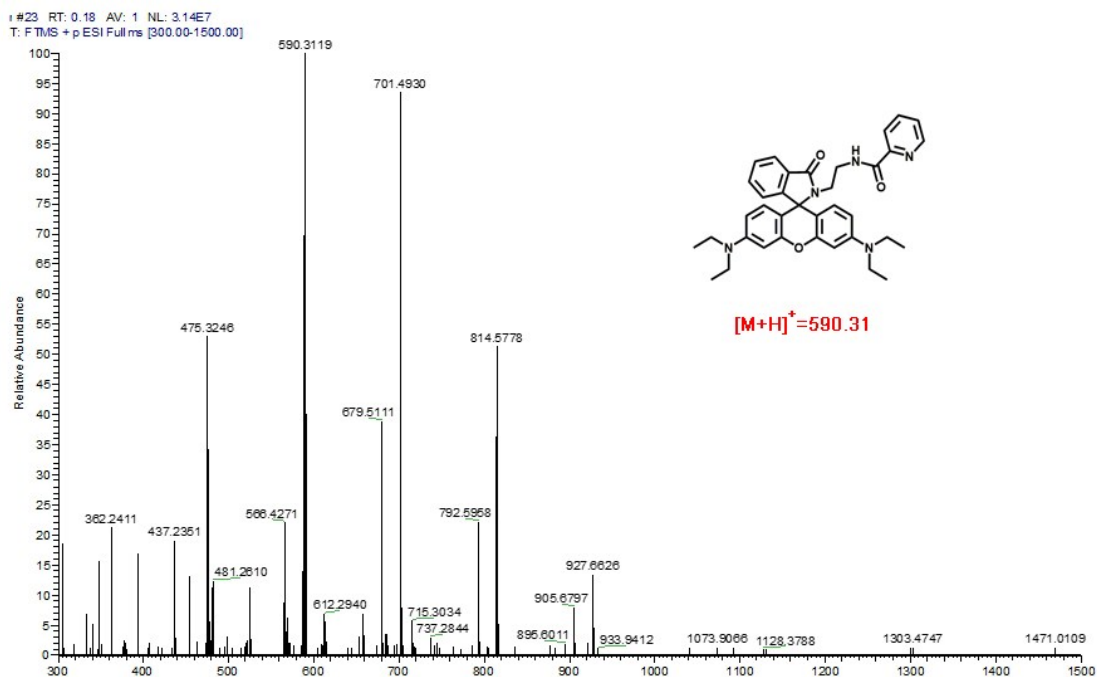

Fig. S-7 ESI-MS spectrum of compound RBPO.

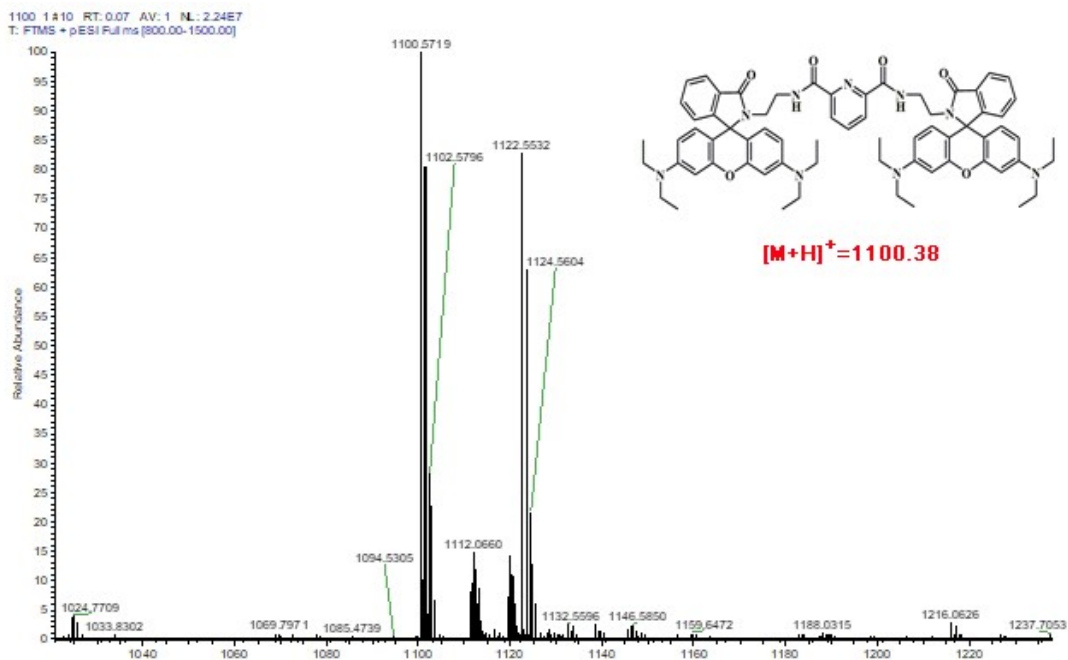

Fig. S-8 ESI-MS spectrum of compound RBPF.

#### 4. Experiment graphs and Tables.

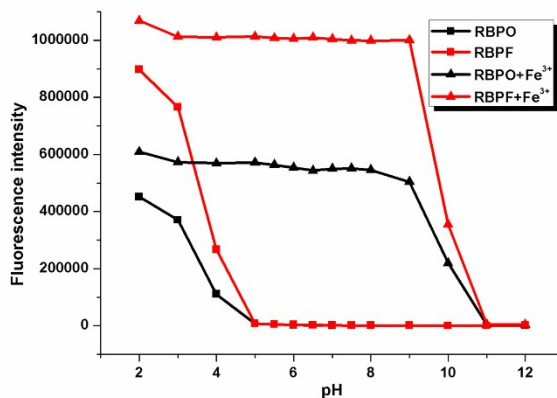

Fig. S-9 Effect of pH on the fluorescence of RBPO (20 $\mu$ M) and RBPF (20 $\mu$ M) in EtOH/H<sub>2</sub>O solutions (3:1, v/v) in the absence and presence of Fe<sup>3+</sup> (100 $\mu$ M). The excitation and emission wavelengths were 560 nm and 582 nm, respectively.

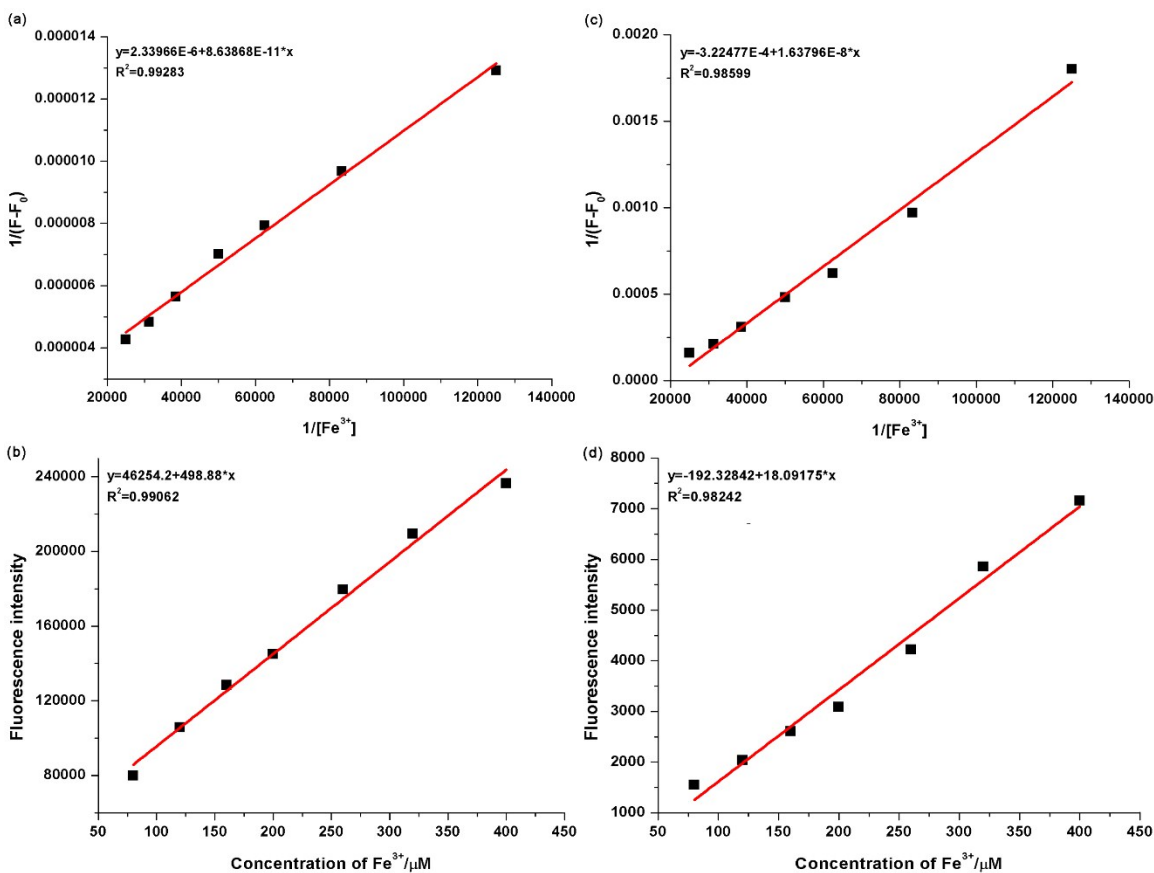

Fig. S-10 (a, c) Benesi-Hildebrand plot ( $\lambda_{em} = 582$  nm) of  $1/(F-F_0)$  vs  $1/[Fe^{3+}]$ . Fluorescent intensity at 582 nm of (b) RBPO (20 $\mu$ M) and (d) RBPF (20 $\mu$ M) 8989, HEPES, 0.5Mm, pH=7.33) with different amounts of Fe<sup>3+</sup>. The excitation wavelength is 560 nm.



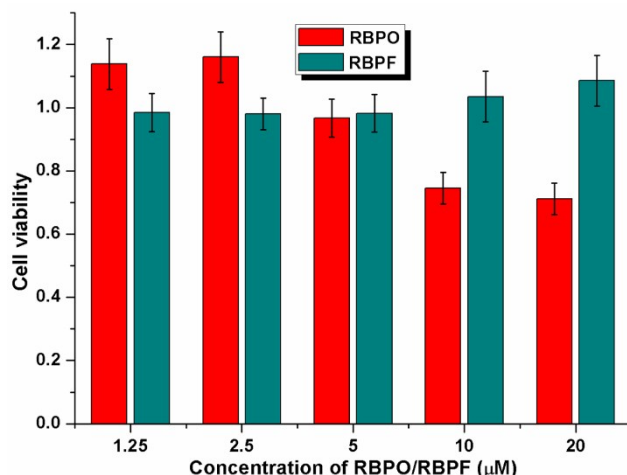

**Fig. S-11** Cytotoxicity assay of chemosensors RBPO and RBPF for human breast adenocarcinoma (MCF-7) cells by the MTT test. Human breast adenocarcinoma (MCF-7) cells were respectively cultured in the presence of different concentrations of RBPO and RBPF (1.25, 2.5, 5, 10, and 20 μM) at 37 °C for 24h. For the control group, human breast adenocarcinoma (MCF-7) cells were incubated under the same conditions but without chemosensors RBPO or RBPF.

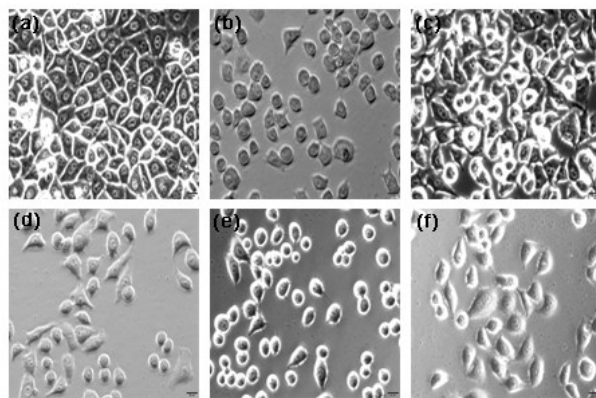

**Fig. S-12** Bright field of cells treated with no RBPO (a), RBPF (d) or Fe<sup>3+</sup>. Cells incubated with (b) RBPO (10μM) and (e) RBPF (10μM) in the bright field. Cells pretreated with (c) RBPO (10μM) and (f) RBPF (10μM) incubated with Fe<sup>3+</sup> (100μM) for 2h in the bright field.

### Calculation of association constant

The association constant ( $K_a$ ) of **RBPO-Fe<sup>3+</sup>** and **RBPF-Fe<sup>3+</sup>** complexes were determined by Benesi-Hildebrand Formula(1):

$$\Delta F = F - F_0 = \Delta F = \Delta F = [Fe^{3+}](F_{max} - F_0)/(1/K_a + [Fe^{3+}]) \quad (1)$$

Where  $F$  is the fluorescence intensity at 582 nm upon addition of different concentration of  $Fe^{3+}$ ,  $F_0$  is the fluorescence intensity at 582 nm in the absence of  $Fe^{3+}$  and  $F_{max}$  is the saturated intensity at 582 nm in the presence of  $Fe^{3+}$ . The association constant ( $K_a$ ) was evaluated graphically by plotting  $1/[F-F_0]$  against  $1/[Fe^{3+}]$ . Linear fit to the data according to the formula (1), through the slope and intercept, the

binding constant of **RBPO** was calculated as  $2.70 \times 10^4 \text{ M}^{-1}$  and the binding constant of **RBPF** was calculated as  $1.97 \times 10^4 \text{ M}^{-1}$ .

### Determination of detection limit

According fluorescence titration experiments, we can also calculate the detection limit of **RBPO** and **RBPF** for  $\text{Fe}^{3+}$ . The fluorescence intensity of the blank samples was measured for 10 times, calculate the standard deviation of the fluorescence intensity at 582nm. Then, make a curve based on the fluorescence intensity of **RBPO/RBPF** at 582 nm and the concentration of  $\text{Fe}^{3+}$  to obtain the slope. The detection limit was calculated according to the following formula:

$$\text{Detection limit} = \frac{3SD}{S} \quad (2)$$

Where SD is the standard deviation of the blank solution detected for 10 times; S is the slope of the calibration curve. Finally, the detection limit of **RBPO** is calculated to be  $0.067 \mu\text{M}$  and the detection limit of **RBPF** is calculated to be  $0.345 \mu\text{M}$ .

**Tab. S-1 Detailed Calculations for Ka of RBPO- $\text{Fe}^{3+}$ .**

| $[\text{Fe}^{3+}] \text{ (M)}$ | $1/[\text{Fe}^{3+}]$ | F                      | F-F <sub>0</sub> | 1/(F-F <sub>0</sub> ) |
|--------------------------------|----------------------|------------------------|------------------|-----------------------|
| 0                              |                      | 2372 (F <sub>0</sub> ) |                  |                       |
| 0.8E-06                        | 1.25E+05             | 79828                  | 77456            | 0.00001291            |
| 1.20E-05                       | 8.33E+04             | 105724                 | 103352           | 0.00000968            |
| 1.60E-05                       | 6.25E+04             | 128513                 | 126141           | 0.00000793            |
| 2.00E-05                       | 5.00E+04             | 144932                 | 142560           | 0.00000701            |
| 2.60E-05                       | 3.85E+04             | 179505                 | 177133           | 0.00000565            |
| 3.20E-05                       | 3.13E+04             | 209391                 | 207019           | 0.00000483            |
| 4.00E-05                       | 2.50E+04             | 236465                 | 234093           | 0.00000427            |

**Tab. S-2 Detailed Calculations for Ka of RBPF- $\text{Fe}^{3+}$ .**

| $[\text{Fe}^{3+}] \text{ (M)}$ | $1/[\text{Fe}^{3+}]$ | F                     | F-F <sub>0</sub> | 1/(F-F <sub>0</sub> ) |
|--------------------------------|----------------------|-----------------------|------------------|-----------------------|
| 0                              |                      | 998 (F <sub>0</sub> ) |                  |                       |
| 0.8E-06                        | 1.25E+05             | 1552                  | 554              | 0.00180               |
| 1.20E-05                       | 8.33E+04             | 2033                  | 1035             | 0.00097               |
| 1.60E-05                       | 6.25E+04             | 2609                  | 1611             | 0.00062               |
| 2.00E-05                       | 5.00E+04             | 3086                  | 2088             | 0.00048               |
| 2.60E-05                       | 3.85E+04             | 4223                  | 3225             | 0.00031               |
| 3.20E-05                       | 3.13E+04             | 5854                  | 4856             | 0.00021               |
| 4.00E-05                       | 2.50E+04             | 7158                  | 6160             | 0.00016               |

**Tab. S-3 Calculations of SD (RBPO).**

| F.I. of the blank solution |      | $X_i - \bar{X}$<br>(i=1,2,3,4,5,6,7,8,9,10) | $(X_i - \bar{X})^2$                                                         |       | SD    |
|----------------------------|------|---------------------------------------------|-----------------------------------------------------------------------------|-------|-------|
| $X_1$                      | 2372 | 19                                          | $Y_1$                                                                       | 361   |       |
| $X_2$                      | 2356 | 3                                           | $Y_2$                                                                       | 9     |       |
| $X_3$                      | 2361 | 8                                           | $Y_3$                                                                       | 64    |       |
| $X_4$                      | 2338 | -15                                         | $Y_4$                                                                       | 225   |       |
| $X_5$                      | 2363 | 10                                          | $Y_5$                                                                       | 100   |       |
| $X_6$                      | 2345 | -8                                          | $Y_6$                                                                       | 64    |       |
| $X_7$                      | 2339 | -14                                         | $Y_7$                                                                       | 196   |       |
| $X_8$                      | 2350 | -3                                          | $Y_8$                                                                       | 9     |       |
| $X_9$                      | 2359 | 6                                           | $Y_9$                                                                       | 36    |       |
| $X_{10}$                   | 2347 | -6                                          | $Y_{10}$                                                                    | 36    |       |
| average value<br>$\bar{X}$ | 2353 |                                             | $SD^2 = (Y_1 + Y_2 + Y_3 + Y_4 + Y_5 + Y_6 + Y_7 + Y_8 + Y_9 + Y_{10}) / 9$ | 122.2 | 11.05 |

Tab. S-4 Calculations of SD (RBPf).

| F.I. of the blank solution |       | $X_i - \bar{X}$<br>(i=1,2,3,4,5,6,7,8,9,10) | $(X_i - \bar{X})^2$                                                         |       | SD   |
|----------------------------|-------|---------------------------------------------|-----------------------------------------------------------------------------|-------|------|
| $X_1$                      | 998   | 3.1                                         | $Y_1$                                                                       | 9.61  |      |
| $X_2$                      | 995   | 0.1                                         | $Y_2$                                                                       | 0.01  |      |
| $X_3$                      | 993   | -1.9                                        | $Y_3$                                                                       | 3.61  |      |
| $X_4$                      | 996   | 1.1                                         | $Y_4$                                                                       | 1.21  |      |
| $X_5$                      | 991   | -3.9                                        | $Y_5$                                                                       | 15.21 |      |
| $X_6$                      | 995   | 0.1                                         | $Y_6$                                                                       | 0.01  |      |
| $X_7$                      | 997   | 2.1                                         | $Y_7$                                                                       | 4.41  |      |
| $X_8$                      | 995   | 0.1                                         | $Y_8$                                                                       | 0.01  |      |
| $X_9$                      | 993   | -1.9                                        | $Y_9$                                                                       | 3.61  |      |
| $X_{10}$                   | 996   | 1.1                                         | $Y_{10}$                                                                    | 1.21  |      |
| average value<br>$\bar{X}$ | 994.9 |                                             | $SD^2 = (Y_1 + Y_2 + Y_3 + Y_4 + Y_5 + Y_6 + Y_7 + Y_8 + Y_9 + Y_{10}) / 9$ | 4.32  | 2.08 |

$$SD = \sqrt{\frac{1}{N-1} \sum_{i=1}^N (X_i - \bar{X})^2}$$

**Tab. S-5 Determination of the recovered Fe<sup>3+</sup> concentration in tap water samples by fluorescent method using RBPO (20μM) and RBPF (20μM).**

| <b>Sample</b> | <b>Amount of spiked Fe<sup>3+</sup> (μM)</b> | <b>Fe<sup>3+</sup> found (μM)</b> | <b>Recovery (%)</b> |
|---------------|----------------------------------------------|-----------------------------------|---------------------|
| 1+RBPO        | 33                                           | 30.41                             | 92.15               |
| 2+RBPO        | 67                                           | 61.52                             | 91.82               |
| 3+RBPO        | 100                                          | 91.82                             | 91.82               |
| 4+RBPO        | 133                                          | 123.24                            | 92.66               |
| 5+RBPO        | 167                                          | 152.81                            | 91.50               |
| 6+RBPO        | 200                                          | 188.33                            | 94.16               |
| 1+RBPF        | 33                                           | 30.06                             | 91.09               |
| 2+RBPF        | 67                                           | 62.47                             | 93.24               |
| 3+RBPF        | 100                                          | 91.28                             | 91.28               |
| 4+RBPF        | 133                                          | 120.11                            | 90.31               |
| 5+RBPF        | 167                                          | 151.59                            | 90.77               |
| 6+RBPF        | 200                                          | 189.13                            | 94.57               |
